# Supplementary material for: Interventions to improve adherence to reporting guidelines in health research: a scoping review protocol
Source: PubMed Central journal article supplement — BMJ Open. 2017 Nov 16;7(11):e017551. doi: 10.1136/bmjopen-2017-017551 (PMC5701974; doi:10.1136/bmjopen-2017-017551), 2017-11-16
Supplement: bmjopen-2017-017551.draft_revisions.pdf [file bmjopen-2017-017551.draft_revisions.pdf]

# BMJ Open

BMJ Open is committed to open peer review. As part of this commitment we make the peer review history of every article we publish publicly available.

When an article is published we post the peer reviewers' comments and the authors' responses online. We also post the versions of the paper that were used during peer review. These are the versions that the peer review comments apply to.

The versions of the paper that follow are the versions that were submitted during the peer review process. They are not the versions of record or the final published versions. They should not be cited or distributed as the published version of this manuscript.

BMJ Open is an open access journal and the full, final, typeset and author-corrected version of record of the manuscript is available on our site with no access controls, subscription charges or pay-per-view fees (<http://bmjopen.bmj.com>).

If you have any questions on BMJ Open's open peer review process please email [info.bmjopen@bmj.com](mailto:info.bmjopen@bmj.com)

# BMJ Open

## Interventions to improve adherence to reporting guidelines in health research: a scoping review protocol

|                                 |                                                                                                                                                                                                                                                                                                                                                                                                                                                                 |
|---------------------------------|-----------------------------------------------------------------------------------------------------------------------------------------------------------------------------------------------------------------------------------------------------------------------------------------------------------------------------------------------------------------------------------------------------------------------------------------------------------------|
| Journal:                        | <i>BMJ Open</i>                                                                                                                                                                                                                                                                                                                                                                                                                                                 |
| Manuscript ID                   | bmjopen-2017-017551                                                                                                                                                                                                                                                                                                                                                                                                                                             |
| Article Type:                   | Protocol                                                                                                                                                                                                                                                                                                                                                                                                                                                        |
| Date Submitted by the Author:   | 01-May-2017                                                                                                                                                                                                                                                                                                                                                                                                                                                     |
| Complete List of Authors:       | Blanco de Tena-Dávila, David; Barcelona Tech, Statistics and Operational Research<br>Kirkham, Jamie; University of Liverpool, Department of Biostatistics<br>Altman, Doug; Centre for Statistics in Medicine<br>Moher, David; Ottawa Hospital Research Institute, Ottawa Methods Centre<br>Boutron, Isabelle; Université Paris Descartes, Centre d'épidémiologie clinique<br>Cobo, Erik; Universitat Politècnica Catalunya, Statistics and Operational Research |
| <b>Primary Subject Heading</b>: | Medical publishing and peer review                                                                                                                                                                                                                                                                                                                                                                                                                              |
| Secondary Subject Heading:      | Evidence based practice                                                                                                                                                                                                                                                                                                                                                                                                                                         |
| Keywords:                       | Reporting guidelines, Scoping review, Adherence                                                                                                                                                                                                                                                                                                                                                                                                                 |
|                                 |                                                                                                                                                                                                                                                                                                                                                                                                                                                                 |

SCHOLARONE™  
Manuscripts

# Interventions to improve adherence to reporting guidelines in health research: a scoping review protocol

## Authors

David Blanco<sup>1</sup>, Jamie Kirkham<sup>2</sup>, Douglas G. Altman<sup>3</sup>, David Moher<sup>4</sup>, Isabelle Boutron<sup>5</sup>, and Erik Cobo<sup>1</sup>.

<sup>1</sup>Statistics and Operations Research Department, Barcelona Tech, Barcelona, Spain.

<sup>2</sup>Department of Biostatistics, University of Liverpool, Liverpool, UK.

<sup>3</sup>Centre for Statistics in Medicine, University of Oxford, Oxford, UK.

<sup>4</sup>Centre for Journalology, Ottawa Hospital Research Institute, Ottawa, Canada.

<sup>5</sup>Centre d'Épidémiologie Clinique, Paris Descartes University, Paris, France.

Correspondence to David Blanco; [david.blanco.tena@upc.edu](mailto:david.blanco.tena@upc.edu)

## Abstract

**Introduction:** There is evidence that the use of some reporting guidelines, such as the Consolidated Standards for Reporting Trials (CONSORT), is associated with improved completeness of reporting. However, the current levels of adherence to reporting guidelines are suboptimal. Over the last few years, several actions aiming to improve compliance with reporting guidelines have been taken and proposed. We will conduct a scoping review of interventions to improve adherence to reporting guidelines that have been evaluated or suggested, in order to inform future interventions.

**Methods and analysis:** Our review will follow the Joanna Briggs Institute scoping review methods manual. We will search for relevant studies in MEDLINE, EMBASE, and Cochrane Library databases, as well as Google Scholar. The reference lists of included studies and the lists of studies citing them will be added.

1  
2  
3 One reviewer will screen the full list, which will be randomly split into two halves and  
4 independently screened by the other two reviewers. Two reviewers will perform data  
5 extraction independently. Discrepancies will be solved through discussion. The  
6 interventions found will be classified as assessed or suggested, as well as according to  
7 different criteria, in relation to the target population (journal policies, journal editors,  
8 authors, reviewers, funders, ethical boards, or others) or the research stage at which  
9 they are performed (design, conducting, reporting, or peer review). Descriptive  
10 statistical analysis will be performed.  
11  
12  
13  
14  
15  
16

17  
18 **Ethics and dissemination:** All findings will be published in peer-reviewed journals.  
19 Results from this scoping review will contribute to a better understanding and a  
20 broader perspective on how the problem of adhering better to reporting guidelines  
21 has been tackled so far. This could be a major first step towards developing future  
22 strategies to improve compliance with reporting guidelines.  
23  
24  
25  
26  
27

## 28 **Strengthens and limitations of the study**

- 29  
30  
31 • Results from this scoping review will contribute to a broader perspective on  
32 how the problem of improving compliance with reporting guidelines has been  
33 addressed so far.
- 34  
35  
36 • This scoping review is part of a larger project whose ultimate goal is to explore  
37 what strategies to improve adherence to reporting guidelines could be  
38 implemented and formally assessed.
- 39  
40  
41 • A potential limitation could be the small number of eligible articles in the  
42 literature.
- 43  
44  
45 • As this is a scoping review, the quality of the evidence will not be assessed.  
46  
47  
48  
49

## 50 **Introduction**

51  
52  
53 Reporting guidelines have been available since the inception of the CONSORT  
54 statement (1996), which provided a minimum set of recommendations for reporting  
55 randomized trials. From that time, different reporting guidelines for different study  
56  
57  
58  
59  
60

1  
2  
3 types and clinical areas have been developed. In general, these guidelines provide  
4 advice on how to report research methods and findings (1).  
5  
6

7  
8 Although the vast majority of reporting guidelines have not yet been assessed as to  
9 whether they help improve the reporting of research (2), for some of them, such as  
10 CONSORT, it has been shown that they enhance the completeness of reporting (3, 4).  
11 Saaman et al. examined the extent of adherence to reporting guidelines in different  
12 areas of health research since the creation of the CONSORT Statement (5). Some  
13 studies reported acceptable overall reporting quality and concluded that it has  
14 improved since the introduction of the CONSORT Statement. However, most of the  
15 reviews (43 of 50, 86%) concluded that more improvement is needed, or that the  
16 reporting quality was inadequate, poor, medium or suboptimal (5).  
17  
18  
19  
20  
21  
22

23  
24 Consequently, several actions aiming to improve adherence to reporting guidelines  
25 have been taken over the last years. Writing aid tools such as WebCONSORT (6) have  
26 been developed and many journals explicitly endorse reporting guidelines (7).  
27  
28 However, few of these interventions have been assessed and some of them have not  
29 been shown to have a benefit (2, 6). Further actions need to be taken to increase the  
30 current levels of adherence to reporting guidelines.  
31  
32  
33  
34  
35

### 36 **Scoping review objective**

37  
38 The goal of this scoping review is to identify interventions aiming to improve  
39 adherence to reporting guidelines in health research. More specifically, in addition to  
40 quantify the effect of those already evaluated, our aim is to gather ideas suggested in  
41 the literature as possible interventions that could be implemented in the future. No  
42 scoping review on this subject has been performed so far.  
43  
44  
45  
46  
47

### 48 **Methods**

49  
50 Our research objectives will be addressed using established scoping review  
51 methodology. Since we aim to provide a wide overview of this field (8), and map the  
52 key concepts underpinning this research area and the main sources and types of  
53 evidence available, we consider that performing a scoping review is the most suitable  
54  
55  
56  
57  
58  
59  
60

1  
2  
3 approach to our problem (9). This protocol will follow the methodology manual  
4 published by the Joanna Briggs Institute for scoping reviews (10).  
5  
6

### 7 **Scoping review questions**

8  
9  
10 We aim to answer the following questions:

- 11  
12 1. What interventions to improve adherence to reporting guidelines in health  
13 research have been evaluated?
- 14  
15 2. What actions to improve adherence to reporting guidelines have been  
16 suggested in the literature?  
17  
18 3. For each intervention found in the questions 1 and 2 above,  
19  
20 a) What was the target population of it? We will consider the following  
21 possible targets: journal policies, journal editors, authors, reviewers,  
22 funders, ethical boards, or others.  
23  
24 b) What research stages does it affect? We will consider the following possible  
25 research stages: design, conducting, reporting, and peer review.  
26  
27 c) In which health care area was it evaluated or suggested?  
28  
29 d) What was the rationale behind it?  
30  
31 e) In case that it was evaluated,  
32 a. How was it evaluated?  
33  
34 b. What reporting guidelines does it consider?  
35  
36 c. What was the effect of it on adherence to the reporting guidelines  
37 mentioned above?  
38  
39  
40  
41  
42

### 43 **Inclusion criteria**

44  
45  
46 We will include:

- 47  
48 1. Studies evaluating interventions aiming to improve the adherence to reporting  
49 guidelines in health research, irrespective of study design.  
50  
51 2. Commentaries, editorials, letters, and studies containing ideas or suggestions  
52 of interventions that can be implemented.  
53  
54  
55  
56  
57  
58  
59  
60

1  
2  
3 We will consider publications written in English, French, German, Catalan, and Spanish.  
4 The reporting guidelines considered will be those shown in the EQUATOR (Enhancing  
5 the QUALity and Transparency Of Health Research) Network website (1) as “Reporting  
6 Guidelines for main study types” (see Table 1). In addition, we will also include  
7 QUOROM (Quality of Reporting of Meta-analysis) for systematic reviews, since it was  
8 the precursor of PRISMA.  
9  
10  
11  
12

### 13 **Search strategy**

14  
15  
16 We will search MEDLINE (via PubMed), EMBASE (via Ovid), and Cochrane Library  
17 databases, as well as Google Scholar, for relevant articles. The search will be limited to  
18 articles published after January 1996, since the CONSORT Statement was the first  
19 reporting guideline in biomedical research and it was elaborated in 1996. The search  
20 strategy has been developed with the help of a librarian of the Barcelona Tech. Table 2  
21 shows the detailed search terms for MEDLINE.  
22  
23  
24  
25  
26  
27

28  
29 The retrieved studies will be exported into the reference manager Mendeley.  
30 Following the removal of duplicates, one reviewer (DB) will first screen the titles and  
31 abstracts for eligibility before reading the full texts, while the other two reviewers (EC  
32 and JK) will be assigned and will screen one of the two random halves in which the full  
33 list will be divided. Second, the reviewers will thoroughly examine the full-text for all  
34 potentially eligible articles to confirm whether the study should be included or not.  
35 One reviewer (DB) will ensure literature saturation by searching the reference lists of  
36 included studies, as well as the lists of articles citing them. Disagreement will be  
37 addressed by consensus after discussion, and the third reviewer (EC or JK) will  
38 be consulted if no consensus is reached.  
39  
40  
41  
42  
43  
44  
45  
46

### 47 **Data extraction**

48  
49  
50 The selected articles will be exported into an Excel file, where the data extraction will  
51 be performed. Two authors (DB and JK) will independently extract data as shown  
52 below:  
53  
54  
55  
56  
57  
58  
59  
60

- 1
- 2
- 3 1. Publication characteristics: title, year of publication, author, design, and field of
- 4 study.
- 5
- 6 2. Characteristics of the intervention:
- 7
- 8 a. Classification as evaluated or suggested.
- 9
- 10 b. Target: journal policies, authors, peer reviewers, journal editors,
- 11 funders, ethical boards, or others.
- 12
- 13 c. Research stage: design, conducting, reporting or peer review.
- 14
- 15 d. Health care area where it was evaluated or suggested.
- 16
- 17 e. Rationale.
- 18
- 19 f. In case that it was evaluated, way of assessment, reporting guidelines
- 20 considered, and effect of the intervention on adherence to those
- 21 reporting guidelines.
- 22
- 23
- 24 3. Overall conclusions by the authors.
- 25
- 26

27 If further information is needed, we will contact the authors of the included studies.

28 Any disagreement will be solved by discussion.

### 30 **Synthesis and reporting of results**

31

32 The interventions found will be first divided in two groups: the ones that have already

33 been evaluated and the ones that have not. For each group, the interventions will be

34 classified according to their target population, as well as to the research stage at which

35 they are performed or suggested. The general characteristics of included studies will

36 be summarized. In addition, for the group of evaluated interventions, we will describe

37 how the authors assess them, what reporting guidelines they consider, and what their

38 effect on adherence to those reporting guidelines is. Descriptive statistical analysis will

39 be performed.

40

41

42

43

44

45

46

47

48

49 A checklist for reporting scoping reviews, the “Preferred Reporting Items for

50 Systematic Reviews and Meta-Analysis: extension for Scoping Reviews (PRISMA-ScR)”,

51 is currently under development (11). If it is available by the time of reporting the

52 results of the scoping review, it will be used.

53

54

55

56

57

58

59

60



## Discussion

The aim of this review is to identify and classify interventions to improve adherence to reporting guidelines. We believe that having a wide picture of how the problem of adhering better to reporting guidelines has been tackled so far, as well as investigating what further actions have been suggested, is critical to facing the problem of improving adherence to reporting guidelines with a broader perspective.

This scoping review is part of a larger project whose ultimate goal is to explore what strategies to improve adherence to reporting guidelines could be implemented and formally assessed. The results of this review could send a message to funders, authors, editors and reviewers about what has already been done to face this critical problem, and about what else could be done from now on. We believe that this review could be a major first step towards developing future strategies to improve adherence to reporting guidelines.

**Funding:** This scoping review belongs to the ESR 14 research project from the Methods in Research on Research (MiRoR) project, which has received funding from the European Union's Horizon 2020 research and innovation programme under the Marie Skłodowska-Curie grant agreement No 676207.

**Authors' contributions:** All authors contributed to conceptualizing and designing the study. DB and EC drafted the manuscript. IB, DM, DGA, and JK made major revisions. All authors read and approved the final version of the manuscript.

**Acknowledgements:** The authors thank the MiRoR Project and Marie Curie Actions for their support and Montse Aragües for her help to develop the search strategy. We are especially grateful to Ketevan Glonti and Darko Hren for their thoughtful comments and suggestions on the final draft of the manuscript.

**Competing interests:** None declared.

**Ethics approval:** Not required.

## References

1. EQUATOR Network. Library for health research reporting. 2011. [www.equator-network.org/resource-centre/library-of-health-research-reporting](http://www.equator-network.org/resource-centre/library-of-health-research-reporting).
2. Stevens A, Shamseer L, Weinstein E, Yazdi F, Turner L, Thielman J, et al. Relation of completeness of reporting of health research to journals' endorsement of reporting guidelines: systematic review. *BMJ*. 2014;348: g3804.
3. Plint AC, Moher D, Morrison A, Schulz K, Altman DG, Hill C, et al. Does the CONSORT checklist improve the quality of reports of randomised controlled trials? A systematic review. *Med J Aust* 2006; 185:263-7.
4. Turner L, Shamseer L, Altman DG, Weeks L, Peters J, Kober T, et al. Consolidated standards of reporting trials (CONSORT) and the completeness of reporting of randomized controlled trials (published in medical journals). *Cochrane Database Syst Rev* 2012; 11:MR000030.
5. Samaan Z, Mbuagbaw L, Kosa D, Borg Debono V, Dillenburg R, Zhang S, Fruci V, Dennis B, Bawor M, Thabane L. A systematic scoping review of adherence to reporting guidelines in health care literature. *J Multidiscip Healthc*. 2013; 6:169–88.
6. Hopewell et al. Impact of a web-based tool (WebCONSORT) to improve the reporting of randomised trials: results of a randomised controlled trial. *BMC Medicine* (2016); 14:199.
7. Case studies: How journals implement reporting guidelines | The EQUATOR Network [Internet]. [Accessed 21 Feb. 2017]. Available at: <http://www.equator-network.org/toolkits/using-guidelines-in-journals/case-studies-how-journals-implement-reporting-guidelines/>
8. Armstrong R, Hall BJ, Doyle J, Waters E. "Scoping the scope" of a cochrane review [Internet]. [Accessed 22 Jan 2017]. Available at: <http://jpubhealth.oxfordjournals.org>
9. Arksey H, O'Malley L. Scoping studies: towards a methodological framework. *Int J Soc Res Methodol* 2005; 8(1):19–32.
10. Peters M, Godfrey C, McInerney P, Soares C, Hanan K, Parker D. The Joanna Briggs Institute Reviewers' Manual 2015: Methodology for JBI Scoping Reviews. 2015. Available at: <http://joannabriggs.org/assets/docs/sumari/Reviewers-Manual-Methodology-for-JBIScoping-Reviews-2015-v2.pdf>
11. Reporting guidelines under development | The EQUATOR Network [Internet]. [Accessed 30 March 2017]. Available at: <http://www.equator-network.org/library/reporting-guidelines-under-development/>

**Table 1**

Description of the acronyms and full names of the reporting guidelines shown in the EQUATOR website as “Reporting Guidelines for main study types”.

| Acronym  | Full name                                                                                       |
|----------|-------------------------------------------------------------------------------------------------|
| CONSORT  | Consolidated Standards of Reporting Trials                                                      |
| STROBE   | Strengthening the Reporting of Observational Studies in Epidemiology                            |
| PRISMA   | Preferred Reporting Items for Systematic Reviews and Meta-Analyses                              |
| SRQR     | Standards for Reporting Qualitative Research                                                    |
| COREQ    | Consolidated criteria for Reporting Qualitative research                                        |
| STARD    | Standard Protocol Items: Recommendations for Interventional Trials                              |
| TRIPOD   | Transparent Reporting of a multivariable prediction model for Individual Prognosis or Diagnosis |
| SQUIRE   | Standards for Quality Improvement Reporting Excellence                                          |
| CHEERS   | Consolidated Health Economic Evaluation Reporting Standards                                     |
| SPIRIT   | Standard Protocol Items: Recommendations for Interventional Trials                              |
| PRISMA-P | Preferred Reporting Items for Systematic Review and Meta-Analysis Protocols                     |
| CARE     | Case Report                                                                                     |
| AGREE    | Appraisal of Guidelines, Research and Evaluation                                                |
| ARRIVE   | Animal Research: Reporting In Vivo Experiments                                                  |
| RIGHT    | Reporting Tool for Practice Guidelines in Health Care                                           |

**Table 2**

Search terms for MEDLINE (from January 1, 1996, to March 31, 2017) via PubMed. These terms are modified for the search in other databases.

| Steps | Search terms                                                                                                        |
|-------|---------------------------------------------------------------------------------------------------------------------|
| S1    | impact* [tw]                                                                                                        |
| S2    | improv* [tw]                                                                                                        |
| S3    | enhanc* [tw]                                                                                                        |
| S4    | boost* [tw]                                                                                                         |
| S5    | increas* [tw]                                                                                                       |
| S6    | influen* [tw]                                                                                                       |
| S7    | effect [tw]                                                                                                         |
| S8    | S1 OR S2 OR S3 OR S4 OR S5 OR S6 OR S7                                                                              |
| S9    | compliance [tw]                                                                                                     |
| S10   | adherence [tw]                                                                                                      |
| S11   | completeness [tw]                                                                                                   |
| S12   | "quality of reporting" [tw]                                                                                         |
| S13   | "reporting quality" [tw]                                                                                            |
| S14   | S9 OR S10 OR S11 OR S12 OR S13                                                                                      |
| S15   | "Consolidated Standards of Reporting Trials"[tw] OR CONSORT[tw]                                                     |
| S16   | "Strengthening the Reporting of Observational Studies in Epidemiology"[tw] OR STROBE[tw]                            |
| S17   | "Preferred Reporting Items for Systematic reviews and Meta-Analyses"[tw] OR PRISMA[tw]                              |
| S18   | "Standards for Reporting Qualitative Research"[tw] OR SRQR[tw]                                                      |
| S19   | "Consolidated criteria for Reporting Qualitative research"[tw] OR COREQ[tw]                                         |
| S20   | "Standard Protocol Items: Recommendations for Interventional Trials"[tw] OR STARD[tw]                               |
| S21   | "Transparent Reporting of a multivariable prediction model for Individual Prognosis or Diagnosis"[tw] OR TRIPOD[tw] |
| S22   | "Standards for Quality Improvement Reporting Excellence"[tw] OR SQUIRE[tw]                                          |
| S23   | "Consolidated Health Economic Evaluation Reporting Standards"[tw] OR CHEERS[tw]                                     |
| S24   | "Standard Protocol Items: Recommendations for Interventional Trials"[tw] OR SPIRIT[tw]                              |
| S25   | "Preferred Reporting Items for Systematic Review and Meta-Analysis Protocols"[tw] OR PRISMA-P[tw]                   |
| S26   | "Quality of Reporting of Meta-analysis"[tw] OR QUOROM[tw]                                                           |
| S27   | "Case Report"[tw] AND CARE[tw]                                                                                      |
| S28   | "Appraisal of Guidelines, Research and Evaluation"[tw] AND AGREE[tw]                                                |
| S29   | "Animal Research: Reporting In Vivo Experiments"[tw] AND ARRIVE[tw]                                                 |
| S30   | "Reporting Tool for Practice Guidelines in Health Care"[tw] AND RIGHT[tw]                                           |
| S31   | S15 OR S16 OR S17 OR S18 OR S19 OR S20 OR S21 OR S22 OR S23 OR S24 OR S25 OR S26 OR S27 OR S28 OR S29 OR S30        |
| S32   | S8 AND S14 AND S31                                                                                                  |
| S33   | S32 AND "1996/01/01"[PDAT] : "2017/01/31"[PDAT]                                                                     |

# BMJ Open

## Interventions to improve adherence to reporting guidelines in health research: a scoping review protocol

|                                 |                                                                                                                                                                                                                                                                                                                                                                                                                                                                 |
|---------------------------------|-----------------------------------------------------------------------------------------------------------------------------------------------------------------------------------------------------------------------------------------------------------------------------------------------------------------------------------------------------------------------------------------------------------------------------------------------------------------|
| Journal:                        | <i>BMJ Open</i>                                                                                                                                                                                                                                                                                                                                                                                                                                                 |
| Manuscript ID                   | bmjopen-2017-017551.R1                                                                                                                                                                                                                                                                                                                                                                                                                                          |
| Article Type:                   | Protocol                                                                                                                                                                                                                                                                                                                                                                                                                                                        |
| Date Submitted by the Author:   | 26-Jun-2017                                                                                                                                                                                                                                                                                                                                                                                                                                                     |
| Complete List of Authors:       | Blanco de Tena-Dávila, David; Barcelona Tech, Statistics and Operational Research<br>Kirkham, Jamie; University of Liverpool, Department of Biostatistics<br>Altman, Doug; Centre for Statistics in Medicine<br>Moher, David; Ottawa Hospital Research Institute, Ottawa Methods Centre<br>Boutron, Isabelle; Université Paris Descartes, Centre d'épidémiologie clinique<br>Cobo, Erik; Universitat Politècnica Catalunya, Statistics and Operational Research |
| <b>Primary Subject Heading</b>: | Medical publishing and peer review                                                                                                                                                                                                                                                                                                                                                                                                                              |
| Secondary Subject Heading:      | Evidence based practice                                                                                                                                                                                                                                                                                                                                                                                                                                         |
| Keywords:                       | Reporting guidelines, Scoping review, Adherence                                                                                                                                                                                                                                                                                                                                                                                                                 |
|                                 |                                                                                                                                                                                                                                                                                                                                                                                                                                                                 |

SCHOLARONE™  
Manuscripts

# Interventions to improve adherence to reporting guidelines in health research: a scoping review protocol

## Authors

David Blanco<sup>1</sup>, Jamie Kirkham<sup>2</sup>, Douglas G. Altman<sup>3</sup>, David Moher<sup>4</sup>, Isabelle Boutron<sup>5</sup>, and Erik Cobo<sup>1</sup>.

<sup>1</sup>Statistics and Operations Research Department, Barcelona Tech, Barcelona, Spain.

<sup>2</sup>Department of Biostatistics, University of Liverpool, Liverpool, UK.

<sup>3</sup>Centre for Statistics in Medicine, University of Oxford, Oxford, UK.

<sup>4</sup>Centre for Journalology, Ottawa Hospital Research Institute, Ottawa, Canada.

<sup>5</sup>Centre d'Epidémiologie Clinique, Paris Descartes University, Paris, France.

Correspondence to David Blanco; [david.blanco.tena@upc.edu](mailto:david.blanco.tena@upc.edu)

## Abstract

**Introduction:** There is evidence that the use of some reporting guidelines, such as the Consolidated Standards for Reporting Trials (CONSORT), is associated with improved completeness of reporting in health research. However, the current levels of adherence to reporting guidelines are suboptimal. Over the last few years, several actions aiming to improve compliance with reporting guidelines have been taken and proposed. We will conduct a scoping review of interventions to improve adherence to reporting guidelines in health research that have been evaluated or suggested, in order to inform future interventions.

**Methods and analysis:** Our review will follow the Joanna Briggs Institute scoping review methods manual. We will search for relevant studies in MEDLINE, EMBASE, and Cochrane Library databases. Moreover, we will carry out

1  
2  
3 25 lateral searches from the reference lists of the included studies, as well as from the  
4  
5 26 lists of articles citing the included ones. One reviewer will screen the full list, which will  
6  
7 27 be randomly split into two halves and independently screened by the other two  
8  
9 28 reviewers. Two reviewers will perform data extraction independently. Discrepancies  
10  
11 29 will be solved through discussion. In addition, this search strategy will be  
12  
13 30 supplemented by a grey literature search. The interventions found will be classified as  
14  
15 31 assessed or suggested, as well as according to different criteria, in relation to their  
16  
17 32 target (journal policies, journal editors, authors, reviewers, funders, ethical boards, or  
18  
19 33 others) or the research stage at which they are performed (design, conducting,  
20  
21 34 reporting, or peer review). Descriptive statistical analysis will be performed.

22 35 **Ethics and dissemination:** A paper summarizing the findings from this review will be  
23  
24 36 published in a peer-reviewed journal. This scoping review will contribute to a better  
25  
26 37 understanding and a broader perspective on how the problem of adhering better to  
27  
28 38 reporting guidelines has been tackled so far. This could be a major first step towards  
29  
30 39 developing future strategies to improve compliance with reporting guidelines in health  
31  
32 40 research.

### 41 **Strengths and limitations of the study**

- 33  
34  
35  
36  
37 42
- 43 • Results from this scoping review will contribute to a broader perspective on  
44 how the problem of improving compliance with reporting guidelines has  
45 been addressed in the published literature thus far.
  - 46 • This scoping review is part of a larger project whose ultimate goal is to  
47 explore what strategies to improve adherence to reporting guidelines could  
48 be implemented and formally assessed.
  - 49 • A potential limitation could be the small number of eligible articles in the  
50 literature.
  - 51 • As this is a scoping review, the quality of the evidence will not be assessed.
- 52  
53  
54  
55  
56  
57  
58  
59  
60

## 53 Introduction

54 Reporting guidelines have been available since the inception of the CONSORT  
55 statement (1996), which provided a minimum set of recommendations for reporting  
56 randomized trials. From that time, different reporting guidelines for different study  
57 types, data, and clinical areas have been developed. In general, these guidelines  
58 provide advice on how to report research methods and findings (1).

59 Although the vast majority of reporting guidelines have not yet been assessed as to  
60 whether they help improve the reporting of research (2), for some of them, such as  
61 CONSORT, it has been shown that they may enhance the completeness of reporting (3,  
62 4).

63 Dozens of systematic reviews have explored the extent of adherence to different  
64 reporting guidelines in some areas of health research (5-9). Saaman et al. (10) went  
65 one step further and performed a systematic review of systematic reviews assessing  
66 adherence to reporting guidelines. As they considered a broad range of clinical areas  
67 and study designs since the creation of the CONSORT Statement, their results provided  
68 a global picture of compliance with reporting guidelines in health research. The  
69 authors determined that, although some studies reported acceptable overall reporting  
70 quality and stated that it has improved since the introduction of the CONSORT  
71 Statement, most of the reviews (43 of 50, 86%) concluded that more improvement is  
72 needed, or that the reporting quality was inadequate, poor, medium or suboptimal.  
73 For this reason, the authors outlined some recommendations to enhance adherence to  
74 reporting guidelines and encouraged action to develop strategies to improve the  
75 current state of completeness of reporting.

76 In recent years, different initiatives aiming to improve adherence to reporting  
77 guidelines have been proposed, and some of them have already been evaluated. For  
78 example, writing aid tools such as WebCONSORT (11) have been developed and  
79 assessed, the influence of statistician involvement on quality of reporting has been  
80 evaluated (12), and different studies have investigated the effect of explicitly  
81 endorsing reporting guidelines on completeness of reporting (3, 4, 13, 14). While some



1  
2  
3 82 of these actions have not been shown to have a benefit (11, 12), others report better  
4  
5 83 but still suboptimal levels of reporting (4, 5, 13 14). Therefore, further actions have to  
6  
7 84 be taken to enhance the current levels of compliance with reporting guidelines.  
8

9  
10 85 As mentioned, several reviews have analyzed the quality of reporting in different  
11  
12 86 clinical areas and for different studies (5-10), but no scoping review investigating what  
13  
14 87 actions have been taken or suggested in order to improve compliance with reporting  
15  
16 88 guidelines has been performed so far. Given the low levels of completeness of  
17  
18 89 reporting in health research observed (10) and the urgent need of taking further  
19  
20 90 actions to mitigate this problem, performing such a scoping review is warranted.

21  
22 91 The goal of this scoping review is to identify interventions aiming to improve  
23  
24 92 adherence to reporting guidelines in health research. More specifically, in addition to  
25  
26 93 quantify the effect of those already evaluated, our aim is to gather ideas suggested in  
27  
28 94 the literature as possible interventions that could be implemented in the future.

## 29 **Methods**

30  
31  
32 96 Our research objectives will be addressed using established scoping review  
33  
34 97 methodology. Since we aim to provide a wide overview of this field (15), and map the  
35  
36 98 key concepts underpinning this research area and the main sources and types of  
37  
38 99 evidence available, we consider that performing a scoping review is the most suitable  
39  
40 100 approach (16). This protocol will follow the methodology manual published by the  
41  
42 101 Joanna Briggs Institute for scoping reviews (17).

### 43 **Scoping review questions**

44  
45  
46 102 We aim to answer the following questions:  
47

- 48  
49 104 1. What interventions to improve adherence to reporting guidelines in health  
50  
51 105 research have been evaluated?  
52  
53 106 2. What actions to improve adherence to reporting guidelines have been  
54  
55 107 suggested in the literature?  
56  
57 108 3. For each intervention found in the questions 1 and 2 above,  
58  
59  
60

- 1  
2  
3 109 a) What was the target? We will consider the following possible targets:  
4  
5 110 journal policies, journal editors, authors, reviewers, funders, ethical boards,  
6  
7 111 or others.  
8  
9 112 b) What research stages does it affect? We will consider the following possible  
10 113 research stages: design, conducting, reporting, and peer review.  
11  
12 114 c) In which health care area was it evaluated or suggested?  
13  
14 115 d) What was the rationale behind it?  
15  
16 116 e) In cases where it was evaluated,  
17 117 a. How was it evaluated?  
18  
19 118 b. What reporting guidelines does it consider?  
20  
21 119 c. What was the effect on adherence to the reporting guidelines  
22 120 mentioned above?  
23  
24

#### 25 121 **Inclusion criteria**

26  
27  
28 122 We will include:

- 29  
30  
31 123 1. Studies evaluating interventions aiming to improve the adherence to reporting  
32 124 guidelines in health research, irrespective of study design.  
33  
34 125 2. Commentaries, editorials, letters, and studies containing ideas or suggestions  
35 126 of interventions that can be implemented.  
36  
37

38  
39 127 The reporting guidelines considered will be those shown in the EQUATOR (Enhancing  
40 128 the QUALity and Transparency Of Health Research) Network website (1) as “Reporting  
41 129 Guidelines for main study types” (see Table 1). In addition, we will also include  
42 130 QUOROM (Quality of Reporting of Meta-analysis) for systematic reviews, since it was  
43 131 the precursor of PRISMA.  
44  
45  
46  
47

#### 48 132 **Exclusion criteria**

49  
50  
51 133 We will consider the following languages: English, French, German, Catalan, and  
52 134 Spanish. Publications not written in any of those languages will be excluded.  
53  
54

#### 55 135 **Search strategy**

56  
57  
58  
59  
60

1  
2  
3 136 We will search MEDLINE (via PubMed), EMBASE, and Cochrane Library databases for  
4  
5 137 relevant articles. The search will be limited to articles published between 1 January  
6  
7 138 1996 and 31 March 2017, given that the CONSORT Statement is considered the first  
8  
9 139 reporting guideline in biomedical research and it was published in 1996. The search  
10  
11 140 strategy has been developed with the help of a librarian of the Barcelona Tech. Table 2  
12  
13 141 and Table 3 show the detailed search terms for MEDLINE and EMBASE. The search  
14  
15 142 terms for Cochrane Library are analogue to those used for EMBASE.

16  
17 143 The retrieved studies will be exported into the reference manager Mendeley, which  
18  
19 144 will be subsequently used to remove the duplicates. One reviewer (DB) will first screen  
20  
21 145 the titles and abstracts for eligibility before reading the full texts, while the other two  
22  
23 146 reviewers (EC and JK) will be assigned and will also screen the titles and the abstracts  
24  
25 147 of one of the two random halves in which the full list will be divided. This process will  
26  
27 148 be carried out in Mendeley. Second, the reviewers will thoroughly examine the full-  
28  
29 149 text for all potentially eligible articles to confirm whether the study should be included  
30  
31 150 or not. One reviewer (DB) will ensure literature saturation by searching the reference  
32  
33 151 lists of included studies, as well as the lists of articles citing them, according to  
34  
35 152 PubMed. Disagreement will be addressed by consensus after discussion, and the third  
36  
37 153 reviewer (EC or JK) will be consulted if no consensus is reached.

38  
39 154 In addition, we will perform a grey literature search, including websites of networks  
40  
41 155 promoting the use of reporting guidelines (i.e. EQUATOR Network), organizations that  
42  
43 156 offer resources for reviewers (i.e. Publons), work groups of medical journal editors (i.e.  
44  
45 157 ICMJE), biomedical journal publishers (i.e. BMJ Publishing Group), or funding agencies  
46  
47 158 (i.e. NIH). In addition, a non-systematic search in Google Scholar will be performed.

48  
49 159 The search will start in early May 2017.

#### 50 **Data extraction**

51  
52 161 The selected articles will be exported into an Excel file, where the data extraction will  
53  
54 162 be performed. Two authors (DB and JK) will independently extract data as shown  
55  
56 163 below:  
57  
58  
59  
60

- 1  
2  
3 164 1. Publication characteristics: title, year of publication, author, design, country of  
4  
5 165 origin, and field of study.  
6  
7 166 2. Characteristics of the intervention:  
8  
9 167 a. Classification as evaluated or suggested.  
10  
11 168 b. Target: journal policies, authors, peer reviewers, journal editors,  
12  
13 169 funders, ethical boards, or others.  
14  
15 170 c. Research stage: design, conducting, reporting or peer review.  
16  
17 171 d. Health care area where it was evaluated or suggested.  
18  
19 172 e. Rationale.  
20  
21 173 f. In case that it was evaluated, way of assessment, reporting guidelines  
22  
23 174 considered, and effect of the intervention on adherence to those  
24  
25 175 reporting guidelines.  
26  
27 176 3. Overall conclusions by the authors.

27 177 If further information is needed, we will contact the authors of the included studies.  
28  
29 178 Any disagreement will be solved by discussion.

### 30 31 179 **Synthesis and reporting of results**

32  
33  
34 180 The interventions found will be first divided in two groups: the ones that have already  
35  
36 181 been evaluated and the ones that have not. For each group, the interventions will be  
37  
38 182 classified according to their target population, as well as to the research stage at which  
39  
40 183 they were performed or suggested. The general characteristics of included studies will  
41  
42 184 be summarized. In addition, for the group of evaluated interventions, we will describe  
43  
44 185 how the authors assessed them, what reporting guidelines they considered, and what  
45  
46 186 their effect on adherence to those reporting guidelines was. Descriptive statistical  
47  
48 187 analysis will be performed.

49  
50 188 A checklist for reporting scoping reviews, the “Preferred Reporting Items for  
51  
52 189 Systematic Reviews and Meta-Analysis: extension for Scoping Reviews (PRISMA-ScR)”,  
53  
54 190 is currently under development (18). However, according to its developers, it is highly  
55  
56 191 unlikely that the checklist will be published before we report the results of the review.

57  
58  
59  
60  
192

## 193 Discussion

194 The aim of this review is to identify and classify interventions to improve adherence to  
195 reporting guidelines. We believe that having a wide picture of how the problem of  
196 adhering better to reporting guidelines has been tackled so far, as well as investigating  
197 what further actions have been suggested, is critical to facing the problem of  
198 improving adherence to reporting guidelines with a broader perspective.

199 This scoping review is part of a larger project whose ultimate goal is to explore what  
200 strategies to improve adherence to reporting guidelines could be implemented and  
201 formally assessed. The results of this review could send a message to funders, authors,  
202 editors and reviewers about what has already been done to face this critical problem,  
203 and about what else could be done from now on. We believe that this review could be  
204 a major first step towards developing future strategies to improve adherence to  
205 reporting guidelines.

206  
207 **Funding:** This scoping review belongs to the ESR 14 research project from the Methods in  
208 Research on Research (MiRoR) project, which has received funding from the European Union's  
209 Horizon 2020 research and innovation programme under the Marie Skłodowska-Curie grant  
210 agreement No 676207.

211 **Authors' contributions:** All authors contributed to conceptualizing and designing the study. DB  
212 and EC drafted the manuscript. IB, DM, DGA, and JK made major revisions. All authors read  
213 and approved the final version of the manuscript.

214 **Acknowledgements:** The authors thank the MiRoR Project and Marie Curie Actions for their  
215 support and Montse Aragües for her help to develop the search strategy. We are especially  
216 grateful to Ketevan Glonti and Darko Hren for their thoughtful comments and suggestions on  
217 the final draft of the manuscript.

218 **Competing interests:** None declared.

219 **Ethics approval:** Not required.

220

221 **References**

- 222 1. EQUATOR Network. Library for health research reporting. 2011. [www.equator-](http://www.equator-network.org/resource-centre/library-of-health-research-reporting)  
223 [network.org/resource-centre/library-of-health-research-reporting](http://www.equator-network.org/resource-centre/library-of-health-research-reporting).
- 224 2. Stevens A, Shamseer L, Weinstein E, Yazdi F, Turner L, Thielman J, et al. Relation of  
225 completeness of reporting of health research to journals' endorsement of reporting  
226 guidelines: systematic review. *BMJ*. 2014;348: g3804.
- 227 3. Plint AC, Moher D, Morrison A, Schulz K, Altman DG, Hill C, et al. Does the CONSORT  
228 checklist improve the quality of reports of randomised controlled trials? A systematic  
229 review. *Med J Aust* 2006; 185:263-7.
- 230 4. Turner L, Shamseer L, Altman DG, Weeks L, Peters J, Kober T, et al. Consolidated  
231 standards of reporting trials (CONSORT) and the completeness of reporting of  
232 randomized controlled trials (published in medical journals). *Cochrane Database Syst*  
233 *Rev* 2012; 11:MR000030.
- 234 5. Bereza BG, Machado M, Einarson TR. Assessing the reporting and scientific quality of  
235 meta-analyses of randomized controlled trials of treatments for anxiety disorders. *Ann*  
236 *Pharmacother*. 2008;42(10):1402–1409.
- 237 6. Froud R, Eldridge S, Diaz Ordaz K, Marinho VC, Donner A. Quality of cluster randomized  
238 controlled trials in oral health: a systematic review of reports published between 2005  
239 and 2009. *Community Dent Oral Epidemiol*. 2012;40 Suppl 1:3–14.
- 240 7. Fung AE, Palanki R, Bakri SJ, Depperschmidt E, Gibson A. Applying the CONSORT and  
241 STROBE statements to evaluate the reporting quality of neovascular age-related  
242 macular degeneration studies. *Ophthalmology*. 2009;116(2):286–296.
- 243 8. Rios LP, Oduyungbo A, Moitri MO, Rahman MO, Thabane L. Quality of reporting of  
244 randomized controlled trials in general endocrinology literature. *J Clin Endocrinol*  
245 *Metab*. 2008;93(10):3810–3816.
- 246 9. Shea B, Bouter LM, Grimshaw JM, et al. Scope for improvement in the quality of  
247 reporting of systematic reviews. From the Cochrane Musculoskeletal Group. *J*  
248 *Rheumatol*. 2006;33(1):9–15.
- 249 10. Samaan Z, Mbuagbaw L, Kosa D, Borg Debono V, Dillenburg R, Zhang S, Fruci V, Dennis  
250 B, Bawor M, Thabane L. A systematic scoping review of adherence to reporting  
251 guidelines in health care literature. *J Multidiscip Healthc*. 2013; 6:169–88.
- 252 11. Hopewell et al. Impact of a web-based tool (WebCONSORT) to improve the reporting  
253 of randomised trials: results of a randomised controlled trial. *BMC Medicine* (2016);  
254 14:199.

- 1  
2  
3 255 12. Influence of statistician involvement on reporting of randomized clinical trials in  
4 256 medical oncology.  
5  
6 257 13. Hopewell S, Ravaud P, Baron G, Boutron I. Effect of editors' implementation of  
7 258 CONSORT guidelines on the reporting of abstracts in high impact medical journals:  
8 259 interrupted time series analysis. *BMJ*.2012;344:e4178.  
9  
10 260 14. Shamseer et al. (2012) Shamseer L, Stevens A, Skidmore B, Turner L, Altman DG, Hirst  
11 261 A, Hoey J, Palepu A, Simera I, Schulz K, Moher D. Does journal endorsement of  
12 262 reporting guidelines influence the completeness of reporting of health research? A  
13 263 systematic review protocol. *Systematic Reviews*. 2012;1(1):24. doi: 10.1186/2046-  
14 264 4053-1-24.  
15  
16 265 15. Armstrong R, Hall BJ, Doyle J, Waters E. "Scoping the scope" of a cochrane review  
17 266 [Internet]. [Accessed 22 Jan 2017]. Available at: <http://pubhealth.oxfordjournals.org>  
18  
19 267 16. Arksey H, O'Malley L. Scoping studies: towards a methodological framework. *Int J Soc*  
20 268 *Res Methodol* 2005; 8(1):19–32.  
21  
22 269 17. Peters M, Godfrey C, McInerney P, Soares C, Hanan K, Parker D. The Joanna Briggs  
23 270 Institute Reviewers' Manual 2015: Methodology for JBI Scoping Reviews. 2015.  
24 271 Available at: <http://joannabriggs.org/assets/docs/sumari/Reviewers->  
25 272 [Manual Methodology-for-JBIScoping-Reviews\\_2015\\_v2.pdf](http://joannabriggs.org/assets/docs/sumari/Reviewers-)  
26  
27 273 18. Reporting guidelines under development | The EQUATOR Network [Internet].  
28 274 [Accessed 30 March 2017]. Available at: <http://www.equator->  
29 275 [network.org/library/reporting-guidelines-under-development/](http://www.equator-)  
30  
31  
32  
33  
34  
35  
36  
37  
38  
39  
40  
41  
42  
43  
44  
45  
46  
47  
48  
49  
50  
51  
52  
53  
54  
55  
56  
57  
58  
59  
60

290

291 **Table 1**

292 Description of the acronyms and full names of the reporting guidelines shown in the  
 293 EQUATOR website as “Reporting Guidelines for main study types”.

294

| Acronym  | Full name                                                                                       |
|----------|-------------------------------------------------------------------------------------------------|
| CONSORT  | Consolidated Standards of Reporting Trials                                                      |
| STROBE   | Strengthening the Reporting of Observational Studies in Epidemiology                            |
| PRISMA   | Preferred Reporting Items for Systematic Reviews and Meta-Analyses                              |
| SRQR     | Standards for Reporting Qualitative Research                                                    |
| COREQ    | Consolidated criteria for Reporting Qualitative research                                        |
| STARD    | Standard Protocol Items: Recommendations for Interventional Trials                              |
| TRIPOD   | Transparent Reporting of a multivariable prediction model for Individual Prognosis or Diagnosis |
| SQUIRE   | Standards for Quality Improvement Reporting Excellence                                          |
| CHEERS   | Consolidated Health Economic Evaluation Reporting Standards                                     |
| SPIRIT   | Standard Protocol Items: Recommendations for Interventional Trials                              |
| PRISMA-P | Preferred Reporting Items for Systematic Review and Meta-Analysis Protocols                     |
| CARE     | Case Report                                                                                     |
| AGREE    | Appraisal of Guidelines, Research and Evaluation                                                |
| ARRIVE   | Animal Research: Reporting In Vivo Experiments                                                  |
| RIGHT    | Reporting Tool for Practice Guidelines in Health Care                                           |

295

296

297

298

299

300

301

302



303

304 **Table 2**

305 Search terms for MEDLINE (from January 1, 1996, to March 31, 2017) via PubMed.

| Steps | Search terms                                                                                                        |
|-------|---------------------------------------------------------------------------------------------------------------------|
| S1    | impact* [tw]                                                                                                        |
| S2    | improv* [tw]                                                                                                        |
| S3    | enhanc* [tw]                                                                                                        |
| S4    | boost* [tw]                                                                                                         |
| S5    | increas* [tw]                                                                                                       |
| S6    | influen* [tw]                                                                                                       |
| S7    | effect [tw]                                                                                                         |
| S8    | S1 OR S2 OR S3 OR S4 OR S5 OR S6 OR S7                                                                              |
| S9    | compliance [tw]                                                                                                     |
| S10   | adherence [tw]                                                                                                      |
| S11   | completeness [tw]                                                                                                   |
| S12   | "quality of reporting" [tw]                                                                                         |
| S13   | "reporting quality" [tw]                                                                                            |
| S14   | S9 OR S10 OR S11 OR S12 OR S13                                                                                      |
| S15   | "Consolidated Standards of Reporting Trials"[tw] OR CONSORT[tw]                                                     |
| S16   | "Strengthening the Reporting of Observational Studies in Epidemiology"[tw] OR STROBE[tw]                            |
| S17   | "Preferred Reporting Items for Systematic reviews and Meta-Analyses"[tw] OR PRISMA[tw]                              |
| S18   | "Standards for Reporting Qualitative Research"[tw] OR SRQR[tw]                                                      |
| S19   | "Consolidated criteria for Reporting Qualitative research"[tw] OR COREQ[tw]                                         |
| S20   | "Standard Protocol Items: Recommendations for Interventional Trials"[tw] OR STARD[tw]                               |
| S21   | "Transparent Reporting of a multivariable prediction model for Individual Prognosis or Diagnosis"[tw] OR TRIPOD[tw] |
| S22   | "Standards for Quality Improvement Reporting Excellence"[tw] OR SQUIRE[tw]                                          |
| S23   | "Consolidated Health Economic Evaluation Reporting Standards"[tw] OR CHEERS[tw]                                     |
| S24   | "Standard Protocol Items: Recommendations for Interventional Trials"[tw] OR SPIRIT[tw]                              |
| S25   | "Preferred Reporting Items for Systematic Review and Meta-Analysis Protocols"[tw] OR PRISMA-P[tw]                   |
| S26   | "Quality of Reporting of Meta-analysis"[tw] OR QUOROM[tw]                                                           |
| S27   | "Case Report"[tw] AND CARE[tw]                                                                                      |
| S28   | "Appraisal of Guidelines, Research and Evaluation"[tw] AND AGREE[tw]                                                |
| S29   | "Animal Research: Reporting In Vivo Experiments"[tw] AND ARRIVE[tw]                                                 |
| S30   | "Reporting Tool for Practice Guidelines in Health Care"[tw] AND RIGHT[tw]                                           |
| S31   | S15 OR S16 OR S17 OR S18 OR S19 OR S20 OR S21 OR S22 OR S23 OR S24 OR S25 OR S26 OR S27 OR S28 OR S29 OR S30        |
| S32   | S8 AND S14 AND S31                                                                                                  |
| S33   | S32 AND "1996/01/01"[PDAT] : "2017/03/31"[PDAT]                                                                     |

306

307

308 **Table 3**

309 Search terms for EMBASE (from January 1, 1996, to March 31, 2017).

| Steps | Search terms                                                                                                            |
|-------|-------------------------------------------------------------------------------------------------------------------------|
| S1    | impact*:ti,ab                                                                                                           |
| S2    | improv*:ti,ab                                                                                                           |
| S3    | enhanc*:ti,ab                                                                                                           |
| S4    | boost*:ti,ab                                                                                                            |
| S5    | increas*:ti,ab                                                                                                          |
| S6    | influenc*:ti,ab                                                                                                         |
| S7    | effect:ti,ab                                                                                                            |
| S8    | S1 OR S2 OR S3 OR S4 OR S5 OR S6 OR S7                                                                                  |
| S9    | compliance:ti,ab                                                                                                        |
| S10   | adherence:ti,ab                                                                                                         |
| S11   | completeness:ti,ab                                                                                                      |
| S12   | "quality of reporting":ti,ab                                                                                            |
| S13   | "reporting quality":ti,ab                                                                                               |
| S14   | S9 OR S10 OR S11 OR S12 OR S13                                                                                          |
| S15   | "Consolidated Standards of Reporting Trials":ti,ab OR CONSORT:ti,ab                                                     |
| S16   | "Strengthening the Reporting of Observational Studies in Epidemiology":ti,ab OR STROBE:ti,ab                            |
| S17   | "Preferred Reporting Items for Systematic reviews and Meta-Analyses":ti,ab OR PRISMA:ti,ab                              |
| S18   | "Standards for Reporting Qualitative Research":ti,ab OR SRQR:ti,ab                                                      |
| S19   | "Consolidated criteria for Reporting Qualitative research":ti,ab OR COREQ:ti,ab                                         |
| S20   | "Standard Protocol Items: Recommendations for Interventional Trials":ti,ab OR STARD:ti,ab                               |
| S21   | "Transparent Reporting of a multivariable prediction model for Individual Prognosis or Diagnosis":ti,ab OR TRIPOD:ti,ab |
| S22   | "Standards for Quality Improvement Reporting Excellence":ti,ab OR SQUIRE:ti,ab                                          |
| S23   | "Consolidated Health Economic Evaluation Reporting Standards":ti,ab OR CHEERS:ti,ab                                     |
| S24   | "Standard Protocol Items: Recommendations for Interventional Trials":ti,ab OR SPIRIT:ti,ab                              |
| S25   | "Preferred Reporting Items for Systematic Review and Meta-Analysis Protocols":ti,ab OR PRISMA-P:ti,ab                   |
| S26   | "Quality of Reporting of Meta-analysis":ti,ab OR QUOROM:ti,ab                                                           |
| S27   | "Case Report":ti,ab AND CARE:ti,ab                                                                                      |
| S28   | "Appraisal of Guidelines, Research and Evaluation":ti,ab AND AGREE:ti,ab                                                |
| S29   | "Animal Research: Reporting In Vivo Experiments":ti,ab AND ARRIVE:ti,ab                                                 |
| S30   | "Reporting Tool for Practice Guidelines in Health Care":ti,ab AND RIGHT:ti,ab                                           |
| S31   | S15 OR S16 OR S17 OR S18 OR S19 OR S20 OR S21 OR S22 OR S23 OR S24 OR S25 OR S26 OR S27 OR S28 OR S29 OR S30            |
| S32   | S8 AND S14 AND S31                                                                                                      |
| S33   | S32 AND AND [1996-2017]/py NOT[3-31-2017]/sd                                                                            |

310

# BMJ Open

## Interventions to improve adherence to reporting guidelines in health research: a scoping review protocol

|                                 |                                                                                                                                                                                                                                                                                                                                                                                                                                                                 |
|---------------------------------|-----------------------------------------------------------------------------------------------------------------------------------------------------------------------------------------------------------------------------------------------------------------------------------------------------------------------------------------------------------------------------------------------------------------------------------------------------------------|
| Journal:                        | <i>BMJ Open</i>                                                                                                                                                                                                                                                                                                                                                                                                                                                 |
| Manuscript ID                   | bmjopen-2017-017551.R2                                                                                                                                                                                                                                                                                                                                                                                                                                          |
| Article Type:                   | Protocol                                                                                                                                                                                                                                                                                                                                                                                                                                                        |
| Date Submitted by the Author:   | 17-Jul-2017                                                                                                                                                                                                                                                                                                                                                                                                                                                     |
| Complete List of Authors:       | Blanco de Tena-Dávila, David; Barcelona Tech, Statistics and Operational Research<br>Kirkham, Jamie; University of Liverpool, Department of Biostatistics<br>Altman, Doug; Centre for Statistics in Medicine<br>Moher, David; Ottawa Hospital Research Institute, Ottawa Methods Centre<br>Boutron, Isabelle; Université Paris Descartes, Centre d'épidémiologie clinique<br>Cobo, Erik; Universitat Politècnica Catalunya, Statistics and Operational Research |
| <b>Primary Subject Heading</b>: | Medical publishing and peer review                                                                                                                                                                                                                                                                                                                                                                                                                              |
| Secondary Subject Heading:      | Evidence based practice                                                                                                                                                                                                                                                                                                                                                                                                                                         |
| Keywords:                       | Reporting guidelines, Scoping review, Adherence                                                                                                                                                                                                                                                                                                                                                                                                                 |
|                                 |                                                                                                                                                                                                                                                                                                                                                                                                                                                                 |

SCHOLARONE™  
Manuscripts

# Interventions to improve adherence to reporting guidelines in health research: a scoping review protocol

## Authors

David Blanco<sup>1</sup>, Jamie Kirkham<sup>2</sup>, Douglas G. Altman<sup>3</sup>, David Moher<sup>4</sup>, Isabelle Boutron<sup>5</sup>, and Erik Cobo<sup>1</sup>.

<sup>1</sup>Statistics and Operations Research Department, Barcelona Tech, Barcelona, Spain.

<sup>2</sup>Department of Biostatistics, University of Liverpool, Liverpool, UK.

<sup>3</sup>Centre for Statistics in Medicine, University of Oxford, Oxford, UK.

<sup>4</sup>Centre for Journalology, Ottawa Hospital Research Institute, Ottawa, Canada.

<sup>5</sup>Centre d'Epidémiologie Clinique, Paris Descartes University, Paris, France.

Correspondence to David Blanco; [david.blanco.tena@upc.edu](mailto:david.blanco.tena@upc.edu)

## Abstract

**Introduction:** There is evidence that the use of some reporting guidelines, such as the Consolidated Standards for Reporting Trials (CONSORT), is associated with improved completeness of reporting in health research. However, the current levels of adherence to reporting guidelines are suboptimal. Over the last few years, several actions aiming to improve compliance with reporting guidelines have been taken and proposed. We will conduct a scoping review of interventions to improve adherence to reporting guidelines in health research that have been evaluated or suggested, in order to inform future interventions.

**Methods and analysis:** Our review will follow the Joanna Briggs Institute scoping review methods manual. We will search for relevant studies in MEDLINE, EMBASE, and Cochrane Library databases. Moreover, we will carry out

1  
2  
3 25 lateral searches from the reference lists of the included studies, as well as from the  
4  
5 26 lists of articles citing the included ones. One reviewer will screen the full list, which will  
6  
7 27 be randomly split into two halves and independently screened by the other two  
8  
9 28 reviewers. Two reviewers will perform data extraction independently. Discrepancies  
10  
11 29 will be solved through discussion. In addition, this search strategy will be  
12  
13 30 supplemented by a grey literature search. The interventions found will be classified as  
14  
15 31 assessed or suggested, as well as according to different criteria, in relation to their  
16  
17 32 target (journal policies, journal editors, authors, reviewers, funders, ethical boards, or  
18  
19 33 others) or the research stage at which they are performed (design, conducting,  
20  
21 34 reporting, or peer review). Descriptive statistical analysis will be performed.

22 35 **Ethics and dissemination:** A paper summarizing the findings from this review will be  
23  
24 36 published in a peer-reviewed journal. This scoping review will contribute to a better  
25  
26 37 understanding and a broader perspective on how the problem of adhering better to  
27  
28 38 reporting guidelines has been tackled so far. This could be a major first step towards  
29  
30 39 developing future strategies to improve compliance with reporting guidelines in health  
31  
32 40 research.

### 41 **Strengths and limitations of the study**

- 33  
34  
35  
36  
37 42
- 43 • Results from this scoping review will contribute to a broader perspective on  
44 how the problem of improving compliance with reporting guidelines has  
45 been addressed in the published literature thus far.
  - 46 • This scoping review is part of a larger project whose ultimate goal is to  
47 explore what strategies to improve adherence to reporting guidelines could  
48 be implemented and formally assessed.
  - 49 • A potential limitation could be the small number of eligible articles in the  
50 literature.
  - 51 • As this is a scoping review, the quality of the evidence will not be assessed.
- 52  
53  
54  
55  
56  
57  
58  
59  
60

## 53 Introduction

54 Reporting guidelines have been available since the inception of the CONSORT  
55 statement (1996), which provided a minimum set of recommendations for reporting  
56 randomized trials. From that time, different reporting guidelines for different study  
57 types, data, and clinical areas have been developed. In general, these guidelines  
58 provide advice on how to report research methods and findings (1).

59 Although the vast majority of reporting guidelines have not yet been assessed as to  
60 whether they help improve the reporting of research (2), for some of them, such as  
61 CONSORT, it has been shown that they may enhance the completeness of reporting (3,  
62 4).

63 Dozens of systematic reviews have explored the extent of adherence to different  
64 reporting guidelines in some areas of health research (5-9). Saaman et al. (10) went  
65 one step further and performed a systematic review of systematic reviews assessing  
66 adherence to reporting guidelines. As they considered a broad range of clinical areas  
67 and study designs since the creation of the CONSORT Statement, their results provided  
68 a global picture of compliance with reporting guidelines in health research. The  
69 authors determined that, although some studies reported acceptable overall reporting  
70 quality and stated that it has improved since the introduction of the CONSORT  
71 Statement, most of the reviews (43 of 50, 86%) concluded that more improvement is  
72 needed, or that the reporting quality was inadequate, poor, medium or suboptimal.  
73 For this reason, the authors outlined some recommendations to enhance adherence to  
74 reporting guidelines and encouraged action to develop strategies to improve the  
75 current state of completeness of reporting.

76 In recent years, different initiatives aiming to improve adherence to reporting  
77 guidelines have been proposed, and some of them have already been evaluated. For  
78 example, writing aid tools such as WebCONSORT (11) have been developed and  
79 assessed, the influence of statistician involvement on quality of reporting has been  
80 evaluated (12), and different studies have investigated the effect of explicitly  
81 endorsing reporting guidelines on completeness of reporting (3, 4, 13, 14). While some

1  
2  
3 82 of these actions have not been shown to have a benefit (11, 12), others report better  
4 83 but still suboptimal levels of reporting (4, 5, 13 14). Therefore, further actions have to  
5  
6 84 be taken to enhance the current levels of compliance with reporting guidelines.  
7  
8

9 85 As mentioned, several reviews have analyzed the quality of reporting in different  
10 86 clinical areas and for different studies (5-10), but no scoping review investigating what  
11 87 actions have been taken or suggested in order to improve compliance with reporting  
12 88 guidelines has been performed so far. Given the low levels of completeness of  
13 89 reporting in health research observed (10) and the need of taking further actions to  
14 90 mitigate this problem, we consider that performing such a scoping review is  
15 91 warranted.  
16  
17  
18  
19  
20  
21

22 92 The goal of this scoping review is to identify interventions aiming to improve  
23 93 adherence to reporting guidelines in health research. More specifically, in addition to  
24 94 quantify the effect of those already evaluated, our aim is to gather ideas suggested in  
25 95 the literature as possible interventions that could be implemented in the future.  
26  
27  
28  
29  
30

## 31 **Methods**

32  
33  
34 97 Our research objectives will be addressed using established scoping review  
35 98 methodology. Since we aim to provide a wide overview of this field (15), and map the  
36 99 key concepts underpinning this research area and the main sources and types of  
37 100 evidence available, we consider that performing a scoping review is the most suitable  
38 101 approach (16). This protocol will follow the methodology manual published by the  
39 102 Joanna Briggs Institute for scoping reviews (17).  
40  
41  
42  
43  
44

### 45 **Scoping review questions**

46  
47  
48 104 We aim to answer the following questions:  
49  
50

- 51 105 1. What interventions to improve adherence to reporting guidelines in health  
52 106 research have been evaluated?  
53  
54 107 2. What actions to improve adherence to reporting guidelines have been  
55 108 suggested in the literature?  
56  
57 109 3. For each intervention found in the questions 1 and 2 above,  
58  
59  
60

- 1  
2  
3 110 a) What was the target? We will consider the following possible targets:  
4  
5 111 journal policies, journal editors, authors, reviewers, funders, ethical boards,  
6  
7 112 or others.  
8  
9 113 b) What research stages does it affect? We will consider the following possible  
10 114 research stages: design, conducting, reporting, and peer review.  
11  
12 115 c) In which health care area was it evaluated or suggested?  
13  
14 116 d) What was the rationale behind it?  
15  
16 117 e) In cases where it was evaluated,  
17 118 a. How was it evaluated?  
18  
19 119 b. What reporting guidelines does it consider?  
20  
21 120 c. What was the effect on adherence to the reporting guidelines  
22 121 mentioned above?  
23  
24

#### 25 122 **Inclusion criteria**

26  
27  
28 123 We will include:

- 29  
30  
31 124 1. Studies evaluating interventions aiming to improve the adherence to reporting  
32 125 guidelines in health research, irrespective of study design.  
33  
34 126 2. Commentaries, editorials, letters, and studies containing ideas or suggestions  
35 127 of interventions that can be implemented.  
36  
37

38  
39 128 The reporting guidelines considered will be those shown in the EQUATOR (Enhancing  
40 129 the QUALity and Transparency Of Health Research) Network website (1) as “Reporting  
41 130 Guidelines for main study types” (see Table 1). In addition, we will also include  
42 131 QUOROM (Quality of Reporting of Meta-analyses) for systematic reviews, since it was  
43 132 the precursor of PRISMA.  
44  
45  
46  
47

#### 48 133 **Exclusion criteria**

49  
50  
51 134 We will consider the following languages: English, French, German, Catalan, and  
52 135 Spanish. Publications not written in any of those languages will be excluded.  
53  
54

#### 55 136 **Search strategy**

56  
57  
58  
59  
60



1  
2  
3 137 We will search MEDLINE (via PubMed), EMBASE, and Cochrane Library databases for  
4  
5 138 relevant articles. The search will be limited to articles published between 1 January  
6  
7 139 1996 and 31 March 2017, given that the CONSORT Statement is considered the first  
8  
9 140 reporting guideline in biomedical research and it was published in 1996. The search  
10  
11 141 strategy has been developed with the help of a librarian of the Barcelona Tech. Table 2  
12  
13 142 and Table 3 show the detailed search terms for MEDLINE and EMBASE. The search  
14  
15 143 terms for Cochrane Library are analogue to those used for EMBASE.

16  
17 144 The retrieved studies will be exported into the reference manager Mendeley, which  
18  
19 145 will be subsequently used to remove the duplicates. One reviewer (DB) will first screen  
20  
21 146 the titles and abstracts for eligibility before reading the full texts, while the other two  
22  
23 147 reviewers (EC and JK) will be assigned and will also screen the titles and the abstracts  
24  
25 148 of one of the two random halves in which the full list will be divided. This process will  
26  
27 149 be carried out in Mendeley. Second, the reviewers will thoroughly examine the full-  
28  
29 150 text for all potentially eligible articles to confirm whether the study should be included  
30  
31 151 or not. One reviewer (DB) will ensure literature saturation by searching the reference  
32  
33 152 lists of included studies, as well as the lists of articles citing them, according to  
34  
35 153 PubMed. Disagreement will be addressed by consensus after discussion, and the third  
36  
37 154 reviewer (EC or JK) will be consulted if no consensus is reached.

38  
39 155 In addition, we will perform a grey literature search, including websites of networks  
40  
41 156 promoting the use of reporting guidelines (i.e. EQUATOR Network), organizations that  
42  
43 157 offer resources for reviewers (i.e. Publons), work groups of medical journal editors (i.e.  
44  
45 158 ICMJE), biomedical journal publishers (i.e. BMJ Publishing Group), or funding agencies  
46  
47 159 (i.e. NIH). In addition, a non-systematic search in Google Scholar will be performed.

48  
49 160 The starting date of the search is 8 May 2017.

#### 50 161 **Data extraction**

51  
52 162 The selected articles will be exported into an Excel file, where the data extraction will  
53  
54 163 be performed. Two authors (DB and JK) will independently extract data as shown  
55  
56 164 below:  
57  
58  
59  
60

- 1  
2  
3 165 1. Publication characteristics: title, year of publication, author, design, country of  
4  
5 166 origin, and field of study.  
6  
7 167 2. Characteristics of the intervention:  
8  
9 168 a. Classification as evaluated or suggested.  
10  
11 169 b. Target: journal policies, authors, peer reviewers, journal editors,  
12  
13 170 funders, ethical boards, or others.  
14  
15 171 c. Research stage: design, conducting, reporting or peer review.  
16  
17 172 d. Health care area where it was evaluated or suggested.  
18  
19 173 e. Rationale.  
20  
21 174 f. In case that it was evaluated, way of assessment, reporting guidelines  
22  
23 175 considered, and effect of the intervention on adherence to those  
24  
25 176 reporting guidelines.  
26  
27 177 3. Overall conclusions by the authors.

28  
29 178 If further information is needed, we will contact the authors of the included studies.

30  
31 179 Any disagreement will be solved by discussion.

### 32 180 **Synthesis and reporting of results**

33  
34 181 The interventions found will be first divided in two groups: the ones that have already  
35  
36 182 been evaluated and the ones that have not. For each group, the interventions will be  
37  
38 183 classified according to their target population, as well as to the research stage at which  
39  
40 184 they were performed or suggested. The general characteristics of included studies will  
41  
42 185 be summarized. In addition, for the group of evaluated interventions, we will describe  
43  
44 186 how the authors assessed them, what reporting guidelines they considered, and what  
45  
46 187 their effect on adherence to those reporting guidelines was. Descriptive statistical  
47  
48 188 analysis will be performed.

49  
50 189 A checklist for reporting scoping reviews, the "Preferred Reporting Items for  
51  
52 190 Systematic Reviews and Meta-Analysis: extension for Scoping Reviews (PRISMA-ScR)",  
53  
54 191 is currently under development (18). However, according to its developers, it is highly  
55  
56 192 unlikely that the checklist will be published before we report the results of the review.

57  
58  
59  
60 193

1  
2  
3 194 **Discussion**  
4  
5

6 195 The aim of this review is to identify and classify interventions to improve adherence to  
7 reporting guidelines. We believe that having a wide picture of how the problem of  
8 196 reporting guidelines. We believe that having a wide picture of how the problem of  
9 adhering better to reporting guidelines has been tackled so far, as well as investigating  
10 197 what further actions have been suggested, is critical to facing the problem of  
11 198 improving adherence to reporting guidelines with a broader perspective.  
12 199

13  
14  
15  
16 200 This scoping review is part of a larger project whose ultimate goal is to explore what  
17 201 strategies to improve adherence to reporting guidelines could be implemented and  
18 202 formally assessed. The results of this review could send a message to funders, authors,  
19 203 editors and reviewers about what has already been done to face this critical problem,  
20 204 and about what else could be done from now on. We believe that this review could be  
21 205 a major first step towards developing future strategies to improve adherence to  
22 206 reporting guidelines.  
23  
24  
25  
26  
27  
28

29 207  
30  
31

32 208 **Funding:** This scoping review belongs to the ESR 14 research project from the Methods in  
33 209 Research on Research (MiRoR) project, which has received funding from the European Union's  
34 210 Horizon 2020 research and innovation programme under the Marie Skłodowska-Curie grant  
35 211 agreement No 676207.  
36  
37  
38

39 212 **Authors' contributions:** All authors contributed to conceptualizing and designing the study. DB  
40 213 and EC drafted the manuscript. IB, DM, DGA, and JK made major revisions. All authors read  
41 214 and approved the final version of the manuscript.  
42  
43  
44

45 215 **Acknowledgements:** The authors thank the MiRoR Project and Marie Curie Actions for their  
46 216 support and Montse Aragües for her help to develop the search strategy. We are especially  
47 217 grateful to Ketevan Glonti and Darko Hren for their thoughtful comments and suggestions on  
48 218 the final draft of the manuscript.  
49  
50  
51

52 219 **Competing interests:** None declared.  
53  
54

55 220 **Ethics approval:** Not required.  
56  
57

58 221  
59  
60

## References

1. EQUATOR Network. Library for health research reporting. 2011. [www.equator-network.org/resource-centre/library-of-health-research-reporting](http://www.equator-network.org/resource-centre/library-of-health-research-reporting).
2. Stevens A, Shamseer L, Weinstein E, Yazdi F, Turner L, Thielman J, et al. Relation of completeness of reporting of health research to journals' endorsement of reporting guidelines: systematic review. *BMJ*. 2014;348: g3804.
3. Plint AC, Moher D, Morrison A, Schulz K, Altman DG, Hill C, et al. Does the CONSORT checklist improve the quality of reports of randomised controlled trials? A systematic review. *Med J Aust* 2006; 185:263-7.
4. Turner L, Shamseer L, Altman DG, Weeks L, Peters J, Kober T, et al. Consolidated standards of reporting trials (CONSORT) and the completeness of reporting of randomized controlled trials (published in medical journals). *Cochrane Database Syst Rev* 2012; 11:MR000030.
5. Bereza BG, Machado M, Einarson TR. Assessing the reporting and scientific quality of meta-analyses of randomized controlled trials of treatments for anxiety disorders. *Ann Pharmacother*. 2008;42(10):1402–1409.
6. Froud R, Eldridge S, Diaz Ordaz K, Marinho VC, Donner A. Quality of cluster randomized controlled trials in oral health: a systematic review of reports published between 2005 and 2009. *Community Dent Oral Epidemiol*. 2012;40 Suppl 1:3–14.
7. Fung AE, Palanki R, Bakri SJ, Depperschmidt E, Gibson A. Applying the CONSORT and STROBE statements to evaluate the reporting quality of neovascular age-related macular degeneration studies. *Ophthalmology*. 2009;116(2):286–296.
8. Rios LP, Oduyungbo A, Moitri MO, Rahman MO, Thabane L. Quality of reporting of randomized controlled trials in general endocrinology literature. *J Clin Endocrinol Metab*. 2008;93(10):3810–3816.
9. Shea B, Bouter LM, Grimshaw JM, et al. Scope for improvement in the quality of reporting of systematic reviews. From the Cochrane Musculoskeletal Group. *J Rheumatol*. 2006;33(1):9–15.
10. Samaan Z, Mbuagbaw L, Kosa D, Borg Debono V, Dillenburg R, Zhang S, Fruci V, Dennis B, Bawor M, Thabane L. A systematic scoping review of adherence to reporting guidelines in health care literature. *J Multidiscip Healthc*. 2013; 6:169–88.
11. Hopewell et al. Impact of a web-based tool (WebCONSORT) to improve the reporting of randomised trials: results of a randomised controlled trial. *BMC Medicine* (2016); 14:199.

- 1  
2  
3 256 12. Influence of statistician involvement on reporting of randomized clinical trials in  
4 257 medical oncology.  
5  
6 258 13. Hopewell S, Ravaud P, Baron G, Boutron I. Effect of editors' implementation of  
7 259 CONSORT guidelines on the reporting of abstracts in high impact medical journals:  
8 260 interrupted time series analysis. *BMJ*.2012;344:e4178.  
9  
10 261 14. Shamseer et al. (2012) Shamseer L, Stevens A, Skidmore B, Turner L, Altman DG, Hirst  
11 262 A, Hoey J, Palepu A, Simera I, Schulz K, Moher D. Does journal endorsement of  
12 263 reporting guidelines influence the completeness of reporting of health research? A  
13 264 systematic review protocol. *Systematic Reviews*. 2012;1(1):24. doi: 10.1186/2046-  
14 265 4053-1-24.  
15  
16 266 15. Armstrong R, Hall BJ, Doyle J, Waters E. "Scoping the scope" of a cochrane review  
17 267 [Internet]. [Accessed 22 Jan 2017]. Available at: <http://pubhealth.oxfordjournals.org>  
18  
19 268 16. Arksey H, O'Malley L. Scoping studies: towards a methodological framework. *Int J Soc*  
20 269 *Res Methodol* 2005; 8(1):19–32.  
21  
22 270 17. Peters M, Godfrey C, McInerney P, Soares C, Hanan K, Parker D. The Joanna Briggs  
23 271 Institute Reviewers' Manual 2015: Methodology for JBI Scoping Reviews. 2015.  
24 272 Available at: <http://joannabriggs.org/assets/docs/sumari/Reviewers->  
25 273 [Manual\\_Methodology-for-JBIScoping-Reviews\\_2015\\_v2.pdf](http://joannabriggs.org/assets/docs/sumari/Reviewers-Manual_Methodology-for-JBIScoping-Reviews_2015_v2.pdf)  
26  
27 274 18. Reporting guidelines under development | The EQUATOR Network [Internet].  
28 275 [Accessed 30 March 2017]. Available at: <http://www.equator->  
29 276 [network.org/library/reporting-guidelines-under-development/](http://www.equator-network.org/library/reporting-guidelines-under-development/)  
30  
31  
32  
33  
34  
35  
36  
37  
38  
39  
40  
41  
42  
43  
44  
45  
46  
47  
48  
49  
50  
51  
52  
53  
54  
55  
56  
57  
58  
59  
60

291

292 **Table 1**

293 Description of the acronyms and full names of the reporting guidelines shown in the

294 EQUATOR website as “Reporting Guidelines for main study types”.

295

| Acronym  | Full name                                                                                       |
|----------|-------------------------------------------------------------------------------------------------|
| CONSORT  | Consolidated Standards of Reporting Trials                                                      |
| STROBE   | Strengthening the Reporting of Observational Studies in Epidemiology                            |
| PRISMA   | Preferred Reporting Items for Systematic Reviews and Meta-Analyses                              |
| SRQR     | Standards for Reporting Qualitative Research                                                    |
| COREQ    | Consolidated criteria for Reporting Qualitative research                                        |
| STARD    | Standard Protocol Items: Recommendations for Interventional Trials                              |
| TRIPOD   | Transparent Reporting of a multivariable prediction model for Individual Prognosis or Diagnosis |
| SQUIRE   | Standards for Quality Improvement Reporting Excellence                                          |
| CHEERS   | Consolidated Health Economic Evaluation Reporting Standards                                     |
| SPIRIT   | Standard Protocol Items: Recommendations for Interventional Trials                              |
| PRISMA-P | Preferred Reporting Items for Systematic Review and Meta-Analysis Protocols                     |
| CARE     | Case Report                                                                                     |
| AGREE    | Appraisal of Guidelines, Research and Evaluation                                                |
| ARRIVE   | Animal Research: Reporting In Vivo Experiments                                                  |
| RIGHT    | Reporting Tool for Practice Guidelines in Health Care                                           |

296

297

298

299

300

301

302

303

304

305 **Table 2**

306 Search terms for MEDLINE (from January 1, 1996, to March 31, 2017) via PubMed.

| Steps | Search terms                                                                                                                             |
|-------|------------------------------------------------------------------------------------------------------------------------------------------|
| S1    | impact* [tw]                                                                                                                             |
| S2    | improv* [tw]                                                                                                                             |
| S3    | enhanc* [tw]                                                                                                                             |
| S4    | boost* [tw]                                                                                                                              |
| S5    | increas* [tw]                                                                                                                            |
| S6    | influen* [tw]                                                                                                                            |
| S7    | effect [tw]                                                                                                                              |
| S8    | S1 OR S2 OR S3 OR S4 OR S5 OR S6 OR S7                                                                                                   |
| S9    | compliance [tw]                                                                                                                          |
| S10   | adherence [tw]                                                                                                                           |
| S11   | completeness [tw]                                                                                                                        |
| S12   | quality of reporting [tw]                                                                                                                |
| S13   | reporting quality [tw]                                                                                                                   |
| S14   | S9 OR S10 OR S11 OR S12 OR S13                                                                                                           |
| S15   | Consolidated [tw] Standards [tw] Reporting [tw] Trials [tw] OR CONSORT[tw]                                                               |
| S16   | Strengthening [tw] Reporting [tw] Observational [tw] Studies [tw] Epidemiology[tw] OR STROBE[tw]                                         |
| S17   | Preferred [tw] Reporting [tw] Items [tw] Systematic [tw] reviews [tw] Meta-Analyses [tw] OR PRISMA[tw]                                   |
| S18   | Standards [tw] Reporting [tw] Qualitative Research[tw] OR SRQR[tw]                                                                       |
| S19   | Consolidated [tw] Criteria [tw] Reporting [tw] Qualitative [tw] Research[tw] OR COREQ[tw]                                                |
| S20   | Standard [tw] Protocol [tw] Items [tw] Recommendations [tw] Interventional [tw] Trials[tw] OR STARD[tw]                                  |
| S21   | Transparent [tw] Reporting [tw] multivariable [tw] prediction [tw] model [tw] Individual [tw] Prognosis [tw] Diagnosis[tw] OR TRIPOD[tw] |
| S22   | Standards [tw] QQuality [tw] Improvement [tw] Reporting [tw] Excellence[tw] OR SQUIRE[tw]                                                |
| S23   | Consolidated [tw] Health [tw] Economic [tw] Evaluation [tw] Reporting [tw] Standards[tw] OR CHEERS[tw]                                   |
| S24   | Standard [tw] Protocol [tw] Items [tw] Recommendations [tw] Interventional [tw] Trials[tw] OR SPIRIT[tw]                                 |
| S25   | Preferred [tw] Reporting [tw] Items [tw] Systematic [tw] Review [tw] Meta-Analysis [tw] Protocols[tw] OR PRISMA-P[tw]                    |
| S26   | Quality [tw] Reporting [tw] Meta-analyses[tw] OR QUOROM[tw]                                                                              |
| S27   | Case [tw] Report [tw] AND CARE[tw]                                                                                                       |
| S28   | Appraisal [tw] Guidelines [tw] Research [tw] Evaluation[tw] AND AGREE[tw]                                                                |
| S29   | Animal [tw] Research [tw] Reporting [tw] Vivo [tw] Experiments[tw] AND ARRIVE[tw]                                                        |
| S30   | Reporting [tw] Tool [tw] Practice [tw] Guidelines [tw] Health [tw] Care[tw] AND RIGHT[tw]                                                |
| S31   | S15 OR S16 OR S17 OR S18 OR S19 OR S20 OR S21 OR S22 OR S23 OR S24 OR S25 OR S26 OR S27 OR S28 OR S29 OR S30                             |

|     |                                                 |
|-----|-------------------------------------------------|
| S32 | S8 AND S14 AND S31                              |
| S33 | S32 AND "1996/01/01"[PDAT] : "2017/03/31"[PDAT] |

307

308

309 **Table 3**

310 Search terms for EMBASE (from January 1, 1996, to March 31, 2017).

| Steps | Search terms                                                                                                            |
|-------|-------------------------------------------------------------------------------------------------------------------------|
| S1    | impact*:ti,ab                                                                                                           |
| S2    | improv*:ti,ab                                                                                                           |
| S3    | enhanc*:ti,ab                                                                                                           |
| S4    | boost*:ti,ab                                                                                                            |
| S5    | increas*:ti,ab                                                                                                          |
| S6    | influenc*:ti,ab                                                                                                         |
| S7    | effect:ti,ab                                                                                                            |
| S8    | S1 OR S2 OR S3 OR S4 OR S5 OR S6 OR S7                                                                                  |
| S9    | compliance:ti,ab                                                                                                        |
| S10   | adherence:ti,ab                                                                                                         |
| S11   | completeness:ti,ab                                                                                                      |
| S12   | "quality of reporting":ti,ab                                                                                            |
| S13   | "reporting quality":ti,ab                                                                                               |
| S14   | S9 OR S10 OR S11 OR S12 OR S13                                                                                          |
| S15   | "Consolidated Standards of Reporting Trials":ti,ab OR CONSORT:ti,ab                                                     |
| S16   | "Strengthening the Reporting of Observational Studies in Epidemiology":ti,ab OR STROBE:ti,ab                            |
| S17   | "Preferred Reporting Items for Systematic reviews and Meta-Analyses":ti,ab OR PRISMA:ti,ab                              |
| S18   | "Standards for Reporting Qualitative Research":ti,ab OR SRQR:ti,ab                                                      |
| S19   | "Consolidated criteria for Reporting Qualitative research":ti,ab OR COREQ:ti,ab                                         |
| S20   | "Standard Protocol Items: Recommendations for Interventional Trials":ti,ab OR STARD:ti,ab                               |
| S21   | "Transparent Reporting of a multivariable prediction model for Individual Prognosis or Diagnosis":ti,ab OR TRIPOD:ti,ab |
| S22   | "Standards for Quality Improvement Reporting Excellence":ti,ab OR SQUIRE:ti,ab                                          |
| S23   | "Consolidated Health Economic Evaluation Reporting Standards":ti,ab OR CHEERS:ti,ab                                     |
| S24   | "Standard Protocol Items: Recommendations for Interventional Trials":ti,ab OR SPIRIT:ti,ab                              |
| S25   | "Preferred Reporting Items for Systematic Review and Meta-Analysis Protocols":ti,ab OR PRISMA-P:ti,ab                   |
| S26   | "Quality of Reporting of Meta-analysis":ti,ab OR QUOROM:ti,ab                                                           |
| S27   | "Case Report":ti,ab AND CARE:ti,ab                                                                                      |
| S28   | "Appraisal of Guidelines, Research and Evaluation":ti,ab AND AGREE:ti,ab                                                |
| S29   | "Animal Research: Reporting In Vivo Experiments":ti,ab AND ARRIVE:ti,ab                                                 |
| S30   | "Reporting Tool for Practice Guidelines in Health Care":ti,ab AND RIGHT:ti,ab                                           |
| S31   | S15 OR S16 OR S17 OR S18 OR S19 OR S20 OR S21 OR S22 OR S23 OR S24 OR S25 OR S26 OR S27                                 |



|     |                                                  |
|-----|--------------------------------------------------|
|     | <b>OR S28 OR S29 OR S30</b>                      |
| S32 | <b>S8 AND S14 AND S31</b>                        |
| S33 | <b>S32 AND [1996-2017]/py NOT [31-3-2017]/sd</b> |

311

For peer review only
